# Supplementary material for: Medusavirus, a Novel Large DNA Virus Discovered from Hot Spring Water
Source: PubMed Central journal article supplement (PMC6450098; doi:10.1128/jvi.02130-18), 2019-04-03
Supplement: JVI.02130-18-s0001.pdf [file JVI.02130-18-s0001.pdf]

SUPPLEMENTAL MATERIAL

**Medusavirus, a Novel Large DNA Virus Discovered from Hot Spring Water**

Genki Yoshikawa<sup>1</sup>, Romain Blanc-Mathieu<sup>1</sup>, Chihong Song<sup>2</sup>, Yoko Kayama<sup>2</sup>, Tomohiro Mochizuki<sup>3</sup>, Kazuyoshi Murata<sup>2,\*</sup>, Hiroyuki Ogata<sup>1,\*</sup>, Masaharu Takemura<sup>4,\*</sup>

<sup>1</sup> Institute for Chemical Research, Kyoto University, Gokasho, Uji, Kyoto, 611-0011, Japan

<sup>2</sup> National Institute for Physiological Sciences, 38 Nishigonaka Myodaiji, Okazaki, Aichi, 444-8585, Japan

<sup>3</sup> Earth-Life Science Institute, Tokyo Institute of Technology, 2-12-1 Ookayama, Meguro, Tokyo, 152-8550, Japan

<sup>4</sup> Faculty of Science, Tokyo University of Science, 1-3 Kagurazaka, Shinjuku, Tokyo, 162-8601, Japan

\* Corresponding authors

**SUPPLEMENTAL MATERIAL file contains:**

Supplemental TABLE S1

**Table S1. Medusavirus genes.**

| ORF no. | Start | End   | Strand | Length (aa) | Annotation                                                  | No. of introns | BLAST best hit Uniref90 gene ID | Organism group | Organism                                     | E-value | % identity |
|---------|-------|-------|--------|-------------|-------------------------------------------------------------|----------------|---------------------------------|----------------|----------------------------------------------|---------|------------|
| 1       | 261   | 647   | -      | 128         | hypothetical protein                                        |                |                                 |                |                                              |         |            |
| 2       | 706   | 1308  | +      | 200         | putative HD hydrolase                                       |                | A0A1X6WFU3                      | Viruses        | Pacmanvirus A23                              | 1.3E-48 | 45.6       |
| 3       | 1356  | 1712  | +      | 118         | hypothetical protein                                        |                |                                 |                |                                              |         |            |
| 4       | 1756  | 2223  | +      | 155         | hypothetical protein                                        |                |                                 |                |                                              |         |            |
| 5       | 2227  | 3456  | -      | 409         | Rho termination factor N-terminal domain-containing protein |                | L8GSA9                          | Eukaryota      | Acanthamoeba castellanii str. Neff           | 6.5E-85 | 39.0       |
| 6       | 3545  | 4138  | +      | 197         | F-box domain-containing protein                             |                | A0A0B5J9H9                      | Viruses        | Pandoravirus inopinatum                      | 1.2E-09 | 34.8       |
| 7       | 4162  | 5202  | +      | 346         | hypothetical protein                                        |                |                                 |                |                                              |         |            |
| 8       | 5189  | 5725  | +      | 178         | hypothetical protein                                        |                | A0A0M4JK20                      | Viruses        | Mollivirus sibericum                         | 1.2E-07 | 21.3       |
| 9       | 5850  | 6590  | +      | 246         | hypothetical protein                                        |                | Q5UNY7                          | Viruses        | Mimiviridae                                  | 3.6E-54 | 38.3       |
| 10      | 6607  | 6804  | -      | 65          | hypothetical protein                                        |                |                                 |                |                                              |         |            |
| 11      | 6811  | 7158  | -      | 115         | hypothetical protein                                        |                |                                 |                |                                              |         |            |
| 12      | 7336  | 12327 | +      | 1663        | Ser/Thr protein kinase                                      |                | W5S4J6                          | Viruses        | Pithovirus sibericum                         | 0.0E+00 | 47.2       |
| 13      | 12348 | 12545 | -      | 65          | hypothetical protein                                        |                |                                 |                |                                              |         |            |
| 14      | 12579 | 12881 | -      | 100         | hypothetical protein                                        |                |                                 |                |                                              |         |            |
| 15      | 12973 | 13437 | +      | 154         | hypothetical protein                                        |                | A0A0M4JT52                      | Viruses        | Mollivirus sibericum                         | 9.6E-74 | 70.7       |
| 16      | 13446 | 14270 | -      | 274         | hypothetical protein                                        |                |                                 |                |                                              |         |            |
| 17      | 14533 | 14832 | -      | 99          | hypothetical protein                                        |                |                                 |                |                                              |         |            |
| 18      | 14841 | 15314 | -      | 157         | hypothetical protein                                        |                |                                 |                |                                              |         |            |
| 19      | 15657 | 16043 | -      | 128         | DUF2493 domain-containing protein                           |                | U2CAU6                          | Bacteria       | Capnocytophaga sp. oral taxon 863 str. F0517 | 5.3E-27 | 47.2       |
| 20      | 16175 | 16405 | +      | 76          | hypothetical protein                                        |                |                                 |                |                                              |         |            |
| 21      | 16569 | 17063 | -      | 164         | hypothetical protein                                        |                |                                 |                |                                              |         |            |
| 22      | 17163 | 17738 | -      | 191         | hypothetical protein                                        |                |                                 |                |                                              |         |            |
| 23      | 17782 | 18426 | -      | 214         | hypothetical protein                                        |                | L8GUY6                          | Eukaryota      | Acanthamoeba castellanii str. Neff           | 1.2E-29 | 44.2       |
| 24      | 18565 | 20628 | +      | 687         | putative glycosyltransferase                                |                | A0A0M4JK29                      | Viruses        | Mollivirus sibericum                         | 0.0E+00 | 46.9       |
| 25      | 20625 | 20909 | -      | 94          | hypothetical protein                                        |                |                                 |                |                                              |         |            |
| 26      | 21076 | 21273 | +      | 65          | hypothetical protein                                        |                |                                 |                |                                              |         |            |

|    |       |       |   |     |                                     |               |           |                                                   |          |      |
|----|-------|-------|---|-----|-------------------------------------|---------------|-----------|---------------------------------------------------|----------|------|
| 27 | 21270 | 23357 | - | 695 | DEDDy 3'-5' exonuclease             | A0A0M5KJQ5    | Viruses   | Mollivirus sibericum                              | 4.1E-128 | 38.0 |
| 28 | 23423 | 24094 | - | 223 | hypothetical protein                |               |           |                                                   |          |      |
| 29 | 24191 | 24463 | - | 90  | hypothetical protein                |               |           |                                                   |          |      |
| 30 | 24521 | 24901 | - | 126 | hypothetical protein                |               |           |                                                   |          |      |
| 31 | 24973 | 25290 | + | 105 | hypothetical protein                |               |           |                                                   |          |      |
| 32 | 25381 | 25641 | + | 86  | hypothetical protein                |               |           |                                                   |          |      |
| 33 | 25657 | 26064 | - | 135 | putative GIY-YIG endonuclease       | A0A0M4JAS0    | Viruses   | Mollivirus sibericum                              | 4.3E-44  | 55.1 |
| 34 | 26137 | 26352 | + | 71  | hypothetical protein                |               |           |                                                   |          |      |
| 35 | 26509 | 26898 | - | 129 | hypothetical protein                | F2U6R5        | Eukaryota | Salpingoeca rosetta (strain ATCC 50818 / BSB-021) | 2.8E-05  | 30.8 |
| 36 | 26910 | 27230 | - | 106 | hypothetical protein                |               |           |                                                   |          |      |
| 37 | 27337 | 28644 | + | 435 | VV A32-like virion packaging ATPase | A0A1Z8URQ2    | Bacteria  | Candidatus Punicispirillum sp. TMED52             | 1.3E-15  | 26.9 |
| 38 | 28654 | 29427 | - | 257 | hypothetical protein                |               |           |                                                   |          |      |
| 39 | 29455 | 29637 | + | 60  | hypothetical protein                |               |           |                                                   |          |      |
| 40 | 29702 | 31003 | - | 433 | nucleotide sugar dehydrogenase      | UPI0009A4E484 | Bacteria  | Zoogloea sp. LCSB751                              | 0.0E+00  | 85.3 |
| 41 | 31109 | 31741 | + | 210 | thymidylate kinase                  | A0A2D6TMM9    | Archaea   | Candidatus Pacearchaeota archaeon                 | 2.9E-39  | 37.8 |
| 42 | 31745 | 31969 | + | 74  | hypothetical protein                |               |           |                                                   |          |      |
| 43 | 31966 | 32400 | - | 144 | hypothetical protein                |               |           |                                                   |          |      |
| 44 | 32468 | 32767 | - | 99  | hypothetical protein                | A0A291ATT6    | Viruses   | Pandoravirus salinus                              | 5.3E-19  | 47.6 |
| 45 | 32888 | 33274 | + | 128 | hypothetical protein                |               |           |                                                   |          |      |
| 46 | 33281 | 33697 | - | 138 | hypothetical protein                |               |           |                                                   |          |      |
| 47 | 33849 | 35162 | + | 437 | MORN repeat-containing protein      | A0A1M7RUL8    | Bacteria  | Oceanicella actignis                              | 1.1E-14  | 33.7 |
| 48 | 35176 | 35631 | - | 151 | hypothetical protein                | L8GGG3        | Eukaryota | Acanthamoeba castellanii str. Neff                | 8.2E-50  | 51.0 |
| 49 | 35712 | 36080 | + | 122 | hypothetical protein                |               |           |                                                   |          |      |
| 50 | 36142 | 36426 | + | 94  | hypothetical protein                |               |           |                                                   |          |      |
| 51 | 36418 | 36693 | - | 91  | hypothetical protein                |               |           |                                                   |          |      |
| 52 | 36865 | 37080 | + | 71  | hypothetical protein                |               |           |                                                   |          |      |
| 53 | 37177 | 38742 | + | 521 | hypothetical protein                |               |           |                                                   |          |      |
| 54 | 38750 | 39043 | - | 97  | hypothetical protein                |               |           |                                                   |          |      |

|    |       |       |   |     |                                 |            |           |                                    |         |      |  |
|----|-------|-------|---|-----|---------------------------------|------------|-----------|------------------------------------|---------|------|--|
| 55 | 39091 | 39651 | - | 186 | hypothetical protein            |            |           |                                    |         |      |  |
| 56 | 39795 | 41003 | - | 402 | hypothetical protein            |            |           |                                    |         |      |  |
| 57 | 41149 | 41553 | + | 134 | hypothetical protein            |            |           |                                    |         |      |  |
| 58 | 41572 | 42399 | - | 275 | hypothetical protein            |            |           |                                    |         |      |  |
| 59 | 42587 | 43045 | + | 152 | hypothetical protein            |            |           |                                    |         |      |  |
| 60 | 43123 | 43734 | + | 203 | hypothetical protein            |            |           |                                    |         |      |  |
| 61 | 43781 | 44341 | - | 186 | histone H2B                     | L8H4F8     | Eukaryota | Acanthamoeba castellanii str. Neff | 9.8E-06 | 36.4 |  |
| 62 | 44503 | 45198 | - | 231 | hypothetical protein            | L8GS30     | Eukaryota | Acanthamoeba castellanii str. Neff | 8.6E-45 | 51.9 |  |
| 63 | 45430 | 45993 | - | 187 | hypothetical protein            |            |           |                                    |         |      |  |
| 64 | 46069 | 47076 | - | 335 | hypothetical protein            | A0A2E4HL59 | Bacteria  | Nitrospinae bacterium              | 3.5E-04 | 22.3 |  |
| 65 | 47220 | 47393 | + | 57  | hypothetical protein            |            |           |                                    |         |      |  |
| 66 | 47399 | 48022 | - | 207 | hypothetical protein            |            |           |                                    |         |      |  |
| 67 | 48192 | 49604 | - | 470 | hypothetical protein            |            |           |                                    |         |      |  |
| 68 | 49763 | 52639 | + | 958 | hypothetical protein            |            |           |                                    |         |      |  |
| 69 | 52668 | 52910 | - | 80  | hypothetical protein            |            |           |                                    |         |      |  |
| 70 | 52925 | 54385 | + | 486 | hypothetical protein            |            |           |                                    |         |      |  |
| 71 | 54414 | 55658 | + | 414 | YqaJ viral recombinase          | M4QS94     |           | root                               | 2.7E-44 | 47.3 |  |
| 72 | 55670 | 56290 | - | 206 | hypothetical protein            |            |           |                                    |         |      |  |
| 73 | 56332 | 56481 | - | 49  | hypothetical protein            |            |           |                                    |         |      |  |
| 74 | 56480 | 58255 | + | 591 | hypothetical protein            | L8GRL8     | Eukaryota | Acanthamoeba castellanii str. Neff | 9.3E-39 | 40.8 |  |
| 75 | 58287 | 58970 | - | 227 | DNA methyltransferase           | A0A1V3K7B5 | Bacteria  | Rodentibacter pneumotropicus       | 1.3E-48 | 47.5 |  |
| 76 | 59043 | 59558 | - | 171 | hypothetical protein            |            |           |                                    |         |      |  |
| 77 | 59590 | 60147 | - | 185 | hypothetical protein            | S4VZD6     | Viruses   | Pandoravirus dulcis                | 7.7E-18 | 33.5 |  |
| 78 | 60215 | 60460 | - | 81  | hypothetical protein            |            |           |                                    |         |      |  |
| 79 | 60495 | 61337 | - | 280 | F-box domain-containing protein |            |           |                                    |         |      |  |
| 80 | 61474 | 62055 | + | 193 | hypothetical protein            |            |           |                                    |         |      |  |
| 81 | 62139 | 63323 | + | 394 | hypothetical protein            |            |           |                                    |         |      |  |
| 82 | 63320 | 64045 | - | 241 | hypothetical protein            |            |           |                                    |         |      |  |

|     |       |       |   |     |                                   |               |           |                                    |         |      |  |
|-----|-------|-------|---|-----|-----------------------------------|---------------|-----------|------------------------------------|---------|------|--|
| 83  | 64116 | 64580 | + | 154 | hypothetical protein              |               |           |                                    |         |      |  |
| 84  | 64604 | 64918 | - | 104 | hypothetical protein              |               |           |                                    |         |      |  |
| 85  | 64979 | 65224 | - | 81  | hypothetical protein              |               |           |                                    |         |      |  |
| 86  | 65325 | 65621 | + | 98  | hypothetical protein              | L8GZP6        | Eukaryota | Acanthamoeba castellanii str. Neff | 1.2E-16 | 45.3 |  |
| 87  | 65622 | 66584 | - | 320 | Ser/Thr protein kinase            | A0A1S3GM49    | Eukaryota | Dipodomys ordii                    | 2.4E-22 | 30.8 |  |
| 88  | 66651 | 67034 | + | 127 | hypothetical protein              |               |           |                                    |         |      |  |
| 89  | 67101 | 67337 | + | 78  | hypothetical protein              |               |           |                                    |         |      |  |
| 90  | 67418 | 68491 | + | 357 | hypothetical protein              |               |           |                                    |         |      |  |
| 91  | 68452 | 68679 | + | 75  | hypothetical protein              |               |           |                                    |         |      |  |
| 92  | 68691 | 69461 | - | 256 | zf-PARP domain-containing protein |               |           |                                    |         |      |  |
| 93  | 69531 | 70853 | - | 440 | DUF4804 domain-containing protein | A0A0U5JC34    | Bacteria  | Candidatus Prochlorlamydia         | 5.1E-69 | 35.0 |  |
| 94  | 70928 | 71827 | - | 299 | hypothetical protein              |               |           |                                    |         |      |  |
| 95  | 71967 | 72587 | + | 206 | hypothetical protein              |               |           |                                    |         |      |  |
| 96  | 72637 | 72978 | + | 113 | hypothetical protein              |               |           |                                    |         |      |  |
| 97  | 72989 | 73768 | - | 259 | hypothetical protein              |               |           |                                    |         |      |  |
| 98  | 73917 | 74927 | + | 336 | hypothetical protein              |               |           |                                    |         |      |  |
| 99  | 75015 | 76262 | + | 415 | hypothetical protein              |               |           |                                    |         |      |  |
| 100 | 76257 | 77132 | - | 291 | hypothetical protein              |               |           |                                    |         |      |  |
| 101 | 77139 | 77276 | - | 45  | hypothetical protein              |               |           |                                    |         |      |  |
| 102 | 77308 | 77862 | - | 184 | hypothetical protein              |               |           |                                    |         |      |  |
| 103 | 78016 | 78825 | - | 269 | hypothetical protein              | L8GWL9        | Eukaryota | Acanthamoeba castellanii str. Neff | 7.8E-78 | 51.0 |  |
| 104 | 78910 | 79113 | + | 67  | hypothetical protein              |               |           |                                    |         |      |  |
| 105 | 79169 | 79402 | + | 77  | hypothetical protein              | A0A1X6WFR4    | Viruses   | Pacmanvirus A23                    | 3.8E-14 | 46.8 |  |
| 106 | 79719 | 80234 | - | 171 | linker histone H1                 | L8GT86        | Eukaryota | Acanthamoeba castellanii str. Neff | 2.0E-27 | 42.8 |  |
| 107 | 80359 | 81555 | - | 398 | hypothetical protein              |               |           |                                    |         |      |  |
| 108 | 81872 | 83044 | - | 390 | hypothetical protein              |               |           |                                    |         |      |  |
| 109 | 83118 | 84104 | - | 328 | F-box domain-containing protein   | L8GRP9        | Eukaryota | Acanthamoeba castellanii str. Neff | 1.3E-17 | 39.7 |  |
| 110 | 84164 | 85099 | - | 311 | hypothetical protein              | UPI0006B61C07 | Archaea   | Halolamina sediminis               | 2.7E-09 | 27.3 |  |

|     |        |        |   |     |                                                             |            |           |                                            |         |      |
|-----|--------|--------|---|-----|-------------------------------------------------------------|------------|-----------|--------------------------------------------|---------|------|
| 111 | 85273  | 86046  | - | 257 | hypothetical protein                                        | L8GIN3     | Eukaryota | Acanthamoeba castellanii str. Neff         | 1.2E-70 | 55.6 |
| 112 | 86112  | 86228  | - | 38  | hypothetical protein                                        |            |           |                                            |         |      |
| 113 | 86231  | 87043  | - | 270 | hypothetical protein                                        | L8GWL9     | Eukaryota | Acanthamoeba castellanii str. Neff         | 6.9E-54 | 41.1 |
| 114 | 87104  | 87394  | + | 96  | hypothetical protein                                        |            |           |                                            |         |      |
| 115 | 87405  | 87968  | - | 187 | hypothetical protein                                        |            |           |                                            |         |      |
| 116 | 88103  | 88804  | + | 233 | Rho termination factor N-terminal domain-containing protein | A0A2E6F125 | Bacteria  | Flavobacteriaceae                          | 3.3E-04 | 42.9 |
| 117 | 88811  | 89650  | - | 279 | hypothetical protein                                        |            |           |                                            |         |      |
| 118 | 89773  | 90477  | + | 234 | hypothetical protein                                        |            |           |                                            |         |      |
| 119 | 90445  | 90711  | - | 88  | hypothetical protein                                        |            |           |                                            |         |      |
| 120 | 90790  | 91956  | + | 388 | hypothetical protein                                        | F2WL63     |           | Viruses                                    | 4.5E-88 | 42.8 |
| 121 | 91996  | 92235  | + | 79  | hypothetical protein                                        |            |           |                                            |         |      |
| 122 | 92250  | 93002  | + | 250 | hypothetical protein                                        | L8GWL9     | Eukaryota | Acanthamoeba castellanii str. Neff         | 7.0E-35 | 42.1 |
| 123 | 93044  | 93838  | + | 264 | PKD domain-containing protein                               | L8GXT2     | Eukaryota | Acanthamoeba castellanii str. Neff         | 3.6E-12 | 30.0 |
| 124 | 93852  | 95024  | - | 390 | hypothetical protein                                        |            |           |                                            |         |      |
| 125 | 95191  | 96474  | + | 427 | poly A polymerase regulatory subunit                        | A0A0D2UAZ4 | Eukaryota | Capsaspora owezarszaki (strain ATCC 30864) | 3.6E-94 | 54.3 |
| 126 | 96493  | 96675  | - | 60  | hypothetical protein                                        |            |           |                                            |         |      |
| 127 | 96739  | 97959  | - | 406 | hypothetical protein                                        |            |           |                                            |         |      |
| 128 | 98097  | 98483  | + | 128 | hypothetical protein                                        |            |           |                                            |         |      |
| 129 | 98471  | 98644  | - | 57  | hypothetical protein                                        | A0A291ATW7 | Viruses   | Pandoravirus dulcis                        | 4.6E-20 | 75.0 |
| 130 | 98650  | 98889  | - | 79  | hypothetical protein                                        |            |           |                                            |         |      |
| 131 | 98919  | 99362  | - | 147 | hypothetical protein                                        |            |           |                                            |         |      |
| 132 | 99443  | 99748  | - | 101 | hypothetical protein                                        | A0A0M4JL7  | Viruses   | Mollivirus sibericum                       | 2.7E-06 | 28.9 |
| 133 | 99829  | 100032 | + | 67  | hypothetical protein                                        |            |           |                                            |         |      |
| 134 | 100241 | 100606 | + | 121 | hypothetical protein                                        | L8GM37     | Eukaryota | Acanthamoeba castellanii str. Neff         | 4.4E-10 | 35.0 |
| 135 | 100658 | 101092 | + | 144 | hypothetical protein                                        |            |           |                                            |         |      |
| 136 | 101102 | 101878 | - | 258 | hypothetical protein                                        |            |           |                                            |         |      |
| 137 | 101882 | 102694 | - | 270 | hypothetical protein                                        |            |           |                                            |         |      |
| 138 | 102712 | 103575 | + | 287 | PIN domain-containing protein                               | L8GYG2     | Eukaryota | Acanthamoeba castellanii str. Neff         | 1.8E-75 | 44.5 |

|     |        |        |   |     |                                   |  |               |           |                                    |          |      |
|-----|--------|--------|---|-----|-----------------------------------|--|---------------|-----------|------------------------------------|----------|------|
| 139 | 103637 | 104431 | + | 264 | BTB/POZ domain-containing protein |  | L8HHL4        | Eukaryota | Acanthamoeba castellanii str. Neff | 7.1E-33  | 38.4 |
| 140 | 104446 | 105576 | - | 376 | hypothetical protein              |  | L8GYB5        | Eukaryota | Acanthamoeba castellanii str. Neff | 1.1E-37  | 36.5 |
| 141 | 105645 | 106766 | - | 373 | hypothetical protein              |  | L8GYB5        | Eukaryota | Acanthamoeba castellanii str. Neff | 1.1E-33  | 35.7 |
| 142 | 106860 | 107138 | - | 92  | hypothetical protein              |  |               |           |                                    |          |      |
| 143 | 107292 | 107624 | + | 110 | hypothetical protein              |  |               |           |                                    |          |      |
| 144 | 107631 | 108170 | - | 179 | hypothetical protein              |  |               |           |                                    |          |      |
| 145 | 108287 | 110536 | + | 749 | Ser/Thr protein kinase            |  | UPI000BE16838 | Eukaryota | Gamasina                           | 3.1E-05  | 29.9 |
| 146 | 110545 | 110757 | - | 70  | hypothetical protein              |  |               |           |                                    |          |      |
| 147 | 110840 | 111397 | + | 185 | hypothetical protein              |  |               |           |                                    |          |      |
| 148 | 111394 | 112410 | - | 338 | Ser/Thr protein kinase            |  | A0A0M4K4H8    | Viruses   | Mollivirus sibericum               | 1.6E-103 | 52.3 |
| 149 | 112930 | 113241 | + | 103 | high mobility group protein       |  | A0A0H5R7U8    | Eukaryota | Spongospora subterranea            | 3.9E-18  | 50.0 |
| 150 | 113271 | 113918 | - | 215 | hypothetical protein              |  |               |           |                                    |          |      |
| 151 | 113967 | 114152 | - | 61  | hypothetical protein              |  |               |           |                                    |          |      |
| 152 | 114203 | 114667 | + | 154 | hypothetical protein              |  |               |           |                                    |          |      |
| 153 | 114795 | 115085 | - | 96  | hypothetical protein              |  |               |           |                                    |          |      |
| 154 | 115138 | 115518 | - | 126 | hypothetical protein              |  | L8H9H2        | Eukaryota | Acanthamoeba castellanii str. Neff | 3.5E-27  | 61.3 |
| 155 | 115589 | 115912 | + | 107 | hypothetical protein              |  |               |           |                                    |          |      |
| 156 | 115921 | 117018 | - | 365 | F-box domain-containing protein   |  | L8GNI3        | Eukaryota | Acanthamoeba castellanii str. Neff | 4.3E-15  | 62.9 |
| 157 | 117091 | 118497 | - | 468 | ankyrin repeat protein            |  | S4VVT0        | Viruses   | Pandoravirus salinus               | 6.5E-147 | 51.8 |
| 158 | 118540 | 120177 | - | 545 | hypothetical protein              |  | A0A182QRX9    | Eukaryota | Anopheles farauti                  | 7.4E-08  | 29.1 |
| 159 | 120268 | 120816 | + | 182 | hypothetical protein              |  |               |           |                                    |          |      |
| 160 | 120807 | 121019 | - | 70  | hypothetical protein              |  |               |           |                                    |          |      |
| 161 | 121598 | 121882 | - | 94  | hypothetical protein              |  |               |           |                                    |          |      |
| 162 | 122571 | 122837 | + | 88  | hypothetical protein              |  | A0A0M3SGV6    | Viruses   | Mollivirus sibericum               | 4.5E-04  | 36.5 |
| 163 | 122824 | 123105 | - | 93  | hypothetical protein              |  |               |           |                                    |          |      |
| 164 | 123131 | 123304 | - | 57  | hypothetical protein              |  |               |           |                                    |          |      |
| 165 | 123311 | 123421 | - | 36  | hypothetical protein              |  |               |           |                                    |          |      |
| 166 | 123431 | 123883 | - | 150 | hypothetical protein              |  | D2XA65        | Viruses   | Marseilleviridae                   | 9.6E-18  | 34.7 |

|     |        |        |   |      |                                         |   |               |             |                                       |          |      |
|-----|--------|--------|---|------|-----------------------------------------|---|---------------|-------------|---------------------------------------|----------|------|
| 167 | 124002 | 124802 | - | 266  | hypothetical protein                    |   | A0A1Q1PNN5    | Viruses     | unclassified<br>Marseilleviridae      | 5.8E-58  | 44.1 |
| 168 | 125236 | 125373 | - | 45   | hypothetical protein                    |   |               |             |                                       |          |      |
| 169 | 126121 | 126795 | - | 224  | zf-PARP domain-containing<br>protein    |   | A0A0C9XC42    | Eukaryota   | Laccaria amethystina<br>LaAM-08-1     | 7.5E-08  | 41.9 |
| 170 | 127111 | 127458 | - | 115  | hypothetical protein                    |   |               |             |                                       |          |      |
| 171 | 127491 | 127859 | + | 122  | hypothetical protein                    |   |               |             |                                       |          |      |
| 172 | 127881 | 128294 | - | 137  | hypothetical protein                    |   |               |             |                                       |          |      |
| 173 | 128377 | 128619 | - | 80   | hypothetical protein                    |   |               |             |                                       |          |      |
| 174 | 128714 | 128911 | + | 65   | hypothetical protein                    |   |               |             |                                       |          |      |
| 175 | 128942 | 129490 | - | 182  | hypothetical protein                    |   | F2WL38        | Viruses     | Lausannevirus                         | 2.5E-18  | 31.3 |
| 176 | 129683 | 130951 | + | 422  | putative HNH endonuclease               |   | Q98528        | Viruses     | Chlorovirus                           | 1.1E-21  | 37.7 |
| 177 | 131116 | 132632 | - | 481  | major capsid protein                    | 1 | L8GRF1        | Eukaryota   | Acanthamoeba<br>castellanii str. Neff | 1.4E-174 | 75.7 |
| 178 | 132883 | 133665 | + | 260  | hypothetical protein                    |   | L8GP88        | Eukaryota   | Acanthamoeba<br>castellanii str. Neff | 4.2E-23  | 35.3 |
| 179 | 133672 | 141015 | - | 2376 | hypothetical protein                    | 1 | L8GMS7        | Eukaryota   | Acanthamoeba<br>castellanii str. Neff | 1.0E-44  | 37.6 |
| 180 | 141117 | 141824 | - | 235  | hypothetical protein                    |   | X0STG9        | metagenomes | marine sediment<br>metagenome         | 5.0E-11  | 31.5 |
| 181 | 141921 | 142598 | + | 225  | hypothetical protein                    |   |               |             |                                       |          |      |
| 182 | 142603 | 143106 | - | 167  | glutaredoxin                            |   | UPI0001778D1C | Eukaryota   | Ochotona princeps                     | 2.1E-05  | 39.7 |
| 183 | 143169 | 143882 | + | 237  | hypothetical protein                    |   |               |             |                                       |          |      |
| 184 | 143839 | 144144 | - | 101  | hypothetical protein                    |   |               |             |                                       |          |      |
| 185 | 144243 | 144635 | + | 130  | hypothetical protein                    |   |               |             |                                       |          |      |
| 186 | 144589 | 145785 | - | 398  | hypothetical protein                    |   | L8GPY3        | Eukaryota   | Acanthamoeba<br>castellanii str. Neff | 1.8E-36  | 30.9 |
| 187 | 145883 | 146245 | + | 120  | hypothetical protein                    |   |               |             |                                       |          |      |
| 188 | 146253 | 149245 | + | 962  | hypothetical protein                    | 1 | L8GRE8        | Eukaryota   | Acanthamoeba<br>castellanii str. Neff | 7.0E-74  | 47.4 |
| 189 | 149306 | 149695 | + | 129  | hypothetical protein                    |   |               |             |                                       |          |      |
| 190 | 149735 | 152296 | + | 853  | hypothetical protein                    |   | L8GSA9        | Eukaryota   | Acanthamoeba<br>castellanii str. Neff | 3.5E-38  | 32.1 |
| 191 | 152304 | 152561 | + | 85   | hypothetical protein                    |   |               |             |                                       |          |      |
| 192 | 152616 | 153632 | + | 338  | putative holliday junction<br>resolvase |   |               |             |                                       |          |      |
| 193 | 153639 | 154238 | - | 199  | hypothetical protein                    |   |               |             |                                       |          |      |
| 194 | 154339 | 155937 | + | 532  | hypothetical protein                    |   |               |             |                                       |          |      |



|     |        |        |   |     |                                           |               |           |                                     |          |      |
|-----|--------|--------|---|-----|-------------------------------------------|---------------|-----------|-------------------------------------|----------|------|
| 195 | 155859 | 156926 | - | 355 | hypothetical protein                      | A0A0B4CHN1    | Bacteria  | Brevundimonas nasdae                | 1.7E-05  | 33.7 |
| 196 | 157265 | 157630 | + | 121 | putative late transcription factor VLTf-3 | A0A2E3ZXZ5    | Bacteria  | Candidatus Marinimicrobia bacterium | 5.4E-19  | 39.3 |
| 197 | 158067 | 159365 | + | 432 | hypothetical protein                      | L8GY54        | Eukaryota | Acanthamoeba castellanii str. Neff  | 7.3E-47  | 39.3 |
| 198 | 159437 | 159877 | + | 146 | hypothetical protein                      |               |           |                                     |          |      |
| 199 | 159954 | 160934 | + | 326 | hypothetical protein                      | L8GTM8        | Eukaryota | Acanthamoeba castellanii str. Neff  | 1.1E-08  | 43.2 |
| 200 | 160938 | 162638 | - | 566 | hypothetical protein                      | L8GL54        | Eukaryota | Acanthamoeba castellanii str. Neff  | 1.5E-10  | 28.6 |
| 201 | 162804 | 163868 | + | 354 | hypothetical protein                      |               |           |                                     |          |      |
| 202 | 163955 | 164278 | + | 107 | hypothetical protein                      | S4VYB1        | Viruses   | Pandoravirus salinus                | 2.5E-24  | 50.0 |
| 203 | 164275 | 164853 | - | 192 | molybdenum cofactor carrier               | L8H0L9        | Eukaryota | Acanthamoeba castellanii str. Neff  | 9.9E-43  | 78.9 |
| 204 | 164927 | 165634 | + | 235 | BTB/POZ domain-containing protein         | M0QSF8        | Eukaryota | Acanthamoeba castellanii str. Neff  | 1.1E-21  | 41.2 |
| 205 | 165701 | 166147 | + | 148 | hypothetical protein                      |               |           |                                     |          |      |
| 206 | 166144 | 167109 | - | 321 | hypothetical protein                      | A0A0B5JBD3    | Viruses   | Pandoravirus inopinatum             | 4.2E-132 | 58.6 |
| 207 | 167171 | 167614 | - | 147 | hypothetical protein                      |               |           |                                     |          |      |
| 208 | 167687 | 168364 | - | 225 | hypothetical protein                      |               |           |                                     |          |      |
| 209 | 168482 | 168943 | - | 153 | dual specificity phosphatase              | S4VXU9        | Viruses   | Pandoravirus dulcis                 | 1.9E-40  | 53.5 |
| 210 | 169012 | 169938 | - | 308 | hypothetical protein                      | L8GF30        | Eukaryota | Acanthamoeba castellanii str. Neff  | 2.8E-58  | 69.2 |
| 211 | 169995 | 170534 | - | 179 | macro domain-containing protein           | UPI000BAEC65D | Eukaryota | Crassostrea virginica               | 1.3E-35  | 42.8 |
| 212 | 170648 | 170845 | + | 65  | hypothetical protein                      |               |           |                                     |          |      |
| 213 | 170929 | 171270 | + | 113 | hypothetical protein                      | L8GEF1        | Eukaryota | Acanthamoeba castellanii str. Neff  | 1.2E-43  | 67.9 |
| 214 | 171309 | 172310 | + | 333 | hypothetical protein                      | L8GH06        | Eukaryota | Acanthamoeba castellanii str. Neff  | 2.2E-21  | 27.7 |
| 215 | 172322 | 172906 | - | 194 | serine hydrolase                          | S4VV52        | Viruses   | Pandoravirus salinus                | 1.1E-76  | 60.1 |
| 216 | 173005 | 173337 | + | 110 | hypothetical protein                      |               |           |                                     |          |      |
| 217 | 173343 | 173654 | - | 103 | hypothetical protein                      |               |           |                                     |          |      |
| 218 | 173722 | 174030 | + | 102 | hypothetical protein                      |               |           |                                     |          |      |
| 219 | 174040 | 175419 | - | 459 | beta-galactosidase                        | A0A0B5JD41    | Viruses   | Pandoravirus inopinatum             | 0.0E+00  | 62.7 |
| 220 | 175464 | 176168 | - | 234 | G2/mitotic-specific cyclin                | L8GRU0        | Eukaryota | Acanthamoeba castellanii str. Neff  | 2.8E-32  | 34.5 |
| 221 | 176241 | 176702 | - | 153 | hypothetical protein                      |               |           |                                     |          |      |
| 222 | 176846 | 177424 | + | 192 | hypothetical protein                      |               |           |                                     |          |      |

|     |        |        |   |     |                                       |   |            |           |                                                   |          |      |
|-----|--------|--------|---|-----|---------------------------------------|---|------------|-----------|---------------------------------------------------|----------|------|
| 223 | 177856 | 178035 | - | 59  | hypothetical protein                  |   |            |           |                                                   |          |      |
| 224 | 178226 | 179128 | - | 300 | ribonuclease HII                      |   | L8GDC2     | Eukaryota | Acanthamoeba castellanii str. Neff                | 5.5E-79  | 55.0 |
| 225 | 179194 | 180261 | + | 355 | hypothetical protein                  |   | L8GYB5     | Eukaryota | Acanthamoeba castellanii str. Neff                | 4.1E-50  | 36.9 |
| 226 | 180274 | 181422 | - | 382 | putative membrane protein             |   | L8GVP3     | Eukaryota | Acanthamoeba castellanii str. Neff                | 2.2E-128 | 59.1 |
| 227 | 181505 | 181762 | - | 85  | hypothetical protein                  |   |            |           |                                                   |          |      |
| 228 | 181876 | 182484 | + | 202 | hypothetical protein                  |   |            |           |                                                   |          |      |
| 229 | 182481 | 183516 | - | 322 | putative VV A32-like packaging ATPase | 1 | L8GKI6     | Eukaryota | Acanthamoeba castellanii str. Neff                | 1.5E-57  | 63.5 |
| 230 | 183756 | 184913 | + | 385 | hypothetical protein                  |   | M1GXL2     | Viruses   | Acanthocystis turfæcea<br>Chlorella virus Canal-1 | 7.8E-49  | 37.2 |
| 231 | 184908 | 185153 | - | 81  | hypothetical protein                  |   |            |           |                                                   |          |      |
| 232 | 185262 | 186266 | - | 334 | hypothetical protein                  |   | L8GKI6     | Eukaryota | Acanthamoeba castellanii str. Neff                | 1.1E-13  | 32.9 |
| 233 | 186344 | 187006 | + | 220 | hypothetical protein                  |   |            |           |                                                   |          |      |
| 234 | 187065 | 187583 | + | 172 | hypothetical protein                  |   |            |           |                                                   |          |      |
| 235 | 187538 | 188095 | - | 185 | hypothetical protein                  |   |            |           |                                                   |          |      |
| 236 | 188145 | 190112 | - | 655 | hypothetical protein                  |   | L8GKD3     | Eukaryota | Acanthamoeba castellanii str. Neff                | 0.0E+00  | 48.8 |
| 237 | 190176 | 190568 | - | 130 | hypothetical protein                  |   |            |           |                                                   |          |      |
| 238 | 190639 | 191022 | - | 127 | hypothetical protein                  |   |            |           |                                                   |          |      |
| 239 | 191089 | 191502 | - | 137 | hypothetical protein                  |   |            |           |                                                   |          |      |
| 240 | 191567 | 191782 | - | 71  | hypothetical protein                  |   |            |           |                                                   |          |      |
| 241 | 191842 | 192255 | - | 137 | hypothetical protein                  |   |            |           |                                                   |          |      |
| 242 | 192314 | 193582 | - | 422 | hypothetical protein                  |   |            |           |                                                   |          |      |
| 243 | 193795 | 194658 | + | 287 | hypothetical protein                  |   |            |           |                                                   |          |      |
| 244 | 194699 | 195508 | + | 269 | putative tRNA-His guanylyltransferase |   | A0A1Y2WX95 | Eukaryota | Daldinia sp. EC12                                 | 3.4E-04  | 25.0 |
| 245 | 195531 | 196253 | + | 240 | putative RING finger protein          |   | L8HI87     | Eukaryota | Acanthamoeba castellanii str. Neff                | 2.9E-05  | 47.4 |
| 246 | 196325 | 196537 | + | 70  | hypothetical protein                  |   |            |           |                                                   |          |      |
| 247 | 196600 | 196842 | + | 80  | hypothetical protein                  |   |            |           |                                                   |          |      |
| 248 | 196866 | 197423 | - | 185 | hypothetical protein                  |   |            |           |                                                   |          |      |
| 249 | 197448 | 197957 | + | 169 | hypothetical protein                  |   |            |           |                                                   |          |      |
| 250 | 197987 | 198688 | + | 233 | hypothetical protein                  |   |            |           |                                                   |          |      |

|     |        |        |   |      |                                       |  |            |           |                                    |         |      |
|-----|--------|--------|---|------|---------------------------------------|--|------------|-----------|------------------------------------|---------|------|
| 251 | 198904 | 199200 | - | 98   | hypothetical protein                  |  |            |           |                                    |         |      |
| 252 | 199247 | 199462 | - | 71   | hypothetical protein                  |  |            |           |                                    |         |      |
| 253 | 199527 | 200072 | - | 181  | hypothetical protein                  |  |            |           |                                    |         |      |
| 254 | 200186 | 200464 | - | 92   | histone H4                            |  |            |           |                                    |         |      |
| 255 | 200585 | 201076 | - | 163  | histone H3                            |  | P08898     |           | cellular organisms                 | 1.4E-21 | 46.3 |
| 256 | 201105 | 202208 | - | 367  | hypothetical protein                  |  | L8GSA9     | Eukaryota | Acanthamoeba castellanii str. Neff | 1.3E-05 | 25.2 |
| 257 | 202268 | 202468 | + | 66   | hypothetical protein                  |  |            |           |                                    |         |      |
| 258 | 202524 | 204506 | + | 660  | hypothetical protein                  |  |            |           |                                    |         |      |
| 259 | 204511 | 205017 | - | 168  | hypothetical protein                  |  |            |           |                                    |         |      |
| 260 | 205171 | 205896 | + | 241  | hypothetical protein                  |  |            |           |                                    |         |      |
| 261 | 206110 | 206643 | - | 177  | hypothetical protein                  |  | L8GVH1     | Eukaryota | Acanthamoeba castellanii str. Neff | 6.9E-27 | 51.7 |
| 262 | 206857 | 210141 | + | 1094 | hypothetical protein                  |  | L8GSA9     | Eukaryota | Acanthamoeba castellanii str. Neff | 1.9E-27 | 28.7 |
| 263 | 210178 | 215310 | - | 1710 | Ser/Thr protein kinase                |  | S4W2F5     | Viruses   | Pandoravirus salinus               | 0.0E+00 | 34.8 |
| 264 | 215519 | 216562 | + | 347  | thymidylate synthase                  |  | A0A1X2HS00 | Eukaryota | Syncephalastrum racemosum          | 2.5E-93 | 43.5 |
| 265 | 216602 | 217042 | + | 146  | hypothetical protein                  |  | L8HJD0     | Eukaryota | Acanthamoeba castellanii str. Neff | 2.6E-09 | 35.8 |
| 266 | 217091 | 217462 | + | 123  | hypothetical protein                  |  |            |           |                                    |         |      |
| 267 | 217459 | 218706 | - | 415  | exonuclease domain-containing protein |  |            |           |                                    |         |      |
| 268 | 218758 | 220086 | - | 442  | hypothetical protein                  |  | Q8QNH4     |           | root                               | 1.9E-09 | 26.3 |
| 269 | 220178 | 220798 | + | 206  | AAA domain-containing protein         |  | L8GH16     | Eukaryota | Acanthamoeba castellanii str. Neff | 1.2E-60 | 52.2 |
| 270 | 220828 | 220995 | + | 55   | hypothetical protein                  |  |            |           |                                    |         |      |
| 271 | 221028 | 221861 | + | 277  | hypothetical protein                  |  |            |           |                                    |         |      |
| 272 | 221946 | 223100 | - | 384  | hypothetical protein                  |  |            |           |                                    |         |      |
| 273 | 223197 | 223649 | + | 150  | hypothetical protein                  |  |            |           |                                    |         |      |
| 274 | 223692 | 224153 | + | 153  | hypothetical protein                  |  |            |           |                                    |         |      |
| 275 | 224237 | 224836 | + | 199  | hypothetical protein                  |  |            |           |                                    |         |      |
| 276 | 224881 | 225351 | + | 156  | hypothetical protein                  |  |            |           |                                    |         |      |
| 277 | 225361 | 225903 | - | 180  | hypothetical protein                  |  |            |           |                                    |         |      |
| 278 | 225931 | 226149 | - | 72   | hypothetical protein                  |  |            |           |                                    |         |      |

|     |        |        |   |     |                                        |   |            |           |                                    |          |      |
|-----|--------|--------|---|-----|----------------------------------------|---|------------|-----------|------------------------------------|----------|------|
| 279 | 226273 | 228847 | + | 637 | ribonucleotide reductase large subunit | 1 | L8HMN7     | Eukaryota | Acanthamoeba castellanii str. Neff | 0.0E+00  | 71.7 |
| 280 | 228877 | 229110 | - | 77  | hypothetical protein                   |   |            |           |                                    |          |      |
| 281 | 229112 | 230176 | - | 354 | hypothetical protein                   |   | L8GID9     | Eukaryota | Acanthamoeba castellanii str. Neff | 9.3E-148 | 55.2 |
| 282 | 230221 | 231039 | - | 272 | class 3 lipase                         |   | L8GV53     | Eukaryota | Acanthamoeba castellanii str. Neff | 9.2E-42  | 39.3 |
| 283 | 231157 | 231870 | + | 237 | hypothetical protein                   |   |            |           |                                    |          |      |
| 284 | 231934 | 233055 | + | 373 | hypothetical protein                   |   |            |           |                                    |          |      |
| 285 | 233062 | 233484 | - | 140 | hypothetical protein                   |   | L8H0K1     | Eukaryota | Acanthamoeba castellanii str. Neff | 5.7E-11  | 71.1 |
| 286 | 233516 | 234820 | - | 434 | hypothetical protein                   |   | B5LJI0     | Viruses   | Mycobacterium phage Myrna          | 1.6E-10  | 34.6 |
| 287 | 234907 | 236136 | - | 409 | ribonucleotide reductase small subunit |   | S4VT34     | Viruses   | Pandoravirus dulcis                | 7.4E-155 | 61.8 |
| 288 | 236257 | 236631 | + | 124 | hypothetical protein                   |   |            |           |                                    |          |      |
| 289 | 236622 | 237656 | - | 344 | hypothetical protein                   |   |            |           |                                    |          |      |
| 290 | 237704 | 238834 | - | 376 | hypothetical protein                   |   | L8GXS6     | Eukaryota | Acanthamoeba castellanii str. Neff | 1.0E-50  | 38.0 |
| 291 | 238918 | 239223 | - | 101 | hypothetical protein                   |   |            |           |                                    |          |      |
| 292 | 239361 | 239915 | + | 184 | hypothetical protein                   |   |            |           |                                    |          |      |
| 293 | 240189 | 240377 | + | 62  | hypothetical protein                   |   |            |           |                                    |          |      |
| 294 | 240408 | 240671 | - | 87  | hypothetical protein                   |   |            |           |                                    |          |      |
| 295 | 240769 | 241158 | + | 129 | hypothetical protein                   |   |            |           |                                    |          |      |
| 296 | 241177 | 241644 | - | 155 | hypothetical protein                   |   |            |           |                                    |          |      |
| 297 | 241726 | 242271 | - | 181 | hypothetical protein                   |   | S4VNY1     | Viruses   | unclassified dsDNA viruses         | 2.4E-89  | 70.7 |
| 298 | 242306 | 243199 | - | 297 | dihydrofolate reductase                |   | S4VY84     | Viruses   | Pandoravirus salinus               | 3.0E-11  | 35.8 |
| 299 | 243244 | 243678 | - | 144 | hypothetical protein                   |   | L8GPM9     | Eukaryota | Acanthamoeba castellanii str. Neff | 1.4E-07  | 36.0 |
| 300 | 243769 | 244596 | + | 275 | BTB/POZ domain-containing protein      |   | A0A2G5UXP4 | Eukaryota | Caenorhabditis nigoni              | 2.0E-05  | 31.4 |
| 301 | 244670 | 245107 | + | 145 | hypothetical protein                   |   |            |           |                                    |          |      |
| 302 | 245223 | 245858 | + | 211 | VV A32-like virion packaging ATPase    |   | A0A0B5J5F3 | Viruses   | Pandoravirus inopinatum            | 2.0E-14  | 29.9 |
| 303 | 245882 | 246844 | - | 320 | hypothetical protein                   |   | L1J4A4     | Eukaryota | Guillardia theta CCMP2712          | 4.9E-07  | 26.8 |
| 304 | 247228 | 247845 | + | 205 | hypothetical protein                   |   |            |           |                                    |          |      |
| 305 | 247881 | 248066 | - | 61  | hypothetical protein                   |   |            |           |                                    |          |      |
| 306 | 248180 | 249769 | - | 529 | hypothetical protein                   |   | L8GNI6     | Eukaryota | Acanthamoeba castellanii str. Neff | 7.4E-52  | 44.4 |

|     |        |        |   |     |                                                             |               |           |                                    |         |      |  |
|-----|--------|--------|---|-----|-------------------------------------------------------------|---------------|-----------|------------------------------------|---------|------|--|
| 307 | 249936 | 250784 | + | 282 | putative proliferating cell nuclear antigen                 |               |           |                                    |         |      |  |
| 308 | 250818 | 253151 | - | 777 | hypothetical protein                                        | L8GNI6        | Eukaryota | Acanthamoeba castellanii str. Neff | 0.0E+00 | 56.8 |  |
| 309 | 253170 | 254117 | - | 315 | F-box domain-containing protein                             | L8GRP9        | Eukaryota | Acanthamoeba castellanii str. Neff | 5.1E-31 | 56.0 |  |
| 310 | 254159 | 255499 | - | 446 | hypothetical protein                                        | L8GY54        | Eukaryota | Acanthamoeba castellanii str. Neff | 1.6E-97 | 62.3 |  |
| 311 | 255589 | 255747 | + | 52  | hypothetical protein                                        |               |           |                                    |         |      |  |
| 312 | 255841 | 256656 | + | 271 | DNA-3-methyladenine glycosylase                             | A0A0M4JB55    | Viruses   | Mollivirus sibericum               | 2.3E-56 | 45.8 |  |
| 313 | 256662 | 257255 | - | 197 | hypothetical protein                                        |               |           |                                    |         |      |  |
| 314 | 257321 | 257719 | - | 132 | hypothetical protein                                        |               |           |                                    |         |      |  |
| 315 | 257798 | 258445 | + | 215 | hypothetical protein                                        |               |           |                                    |         |      |  |
| 316 | 258532 | 259086 | + | 184 | deoxycytidylate deaminase                                   | A0A0M4K765    | Viruses   | Mollivirus sibericum               | 6.3E-71 | 60.2 |  |
| 317 | 259250 | 260023 | - | 257 | hypothetical protein                                        |               |           |                                    |         |      |  |
| 318 | 260170 | 260871 | + | 233 | histone H2A                                                 | H9JMY0        | Eukaryota | Bombyx mori                        | 1.1E-09 | 41.2 |  |
| 319 | 261013 | 263145 | + | 710 | PIF1-like helicase                                          | W7HWQ6        | Eukaryota | Drechlerella stenobrocha 248       | 3.6E-50 | 30.6 |  |
| 320 | 263178 | 263393 | + | 71  | hypothetical protein                                        |               |           |                                    |         |      |  |
| 321 | 263414 | 265012 | - | 532 | Rho termination factor N-terminal domain-containing protein | L8GSA9        | Eukaryota | Acanthamoeba castellanii str. Neff | 1.2E-34 | 31.2 |  |
| 322 | 265143 | 265331 | + | 62  | hypothetical protein                                        |               |           |                                    |         |      |  |
| 323 | 265297 | 265653 | + | 118 | hypothetical protein                                        |               |           |                                    |         |      |  |
| 324 | 265662 | 266813 | - | 383 | Ser/Thr protein kinase                                      | Q8H1P2        | Eukaryota | Soja                               | 1.7E-16 | 31.0 |  |
| 325 | 267124 | 268866 | + | 580 | hypothetical protein                                        |               |           |                                    |         |      |  |
| 326 | 268909 | 270204 | - | 431 | hypothetical protein                                        |               |           |                                    |         |      |  |
| 327 | 270397 | 271188 | + | 263 | hypothetical protein                                        |               |           |                                    |         |      |  |
| 328 | 271292 | 271888 | + | 198 | hypothetical protein                                        |               |           |                                    |         |      |  |
| 329 | 271951 | 272709 | + | 252 | putative myristoylated membrane protein                     | L8GWW3        | Eukaryota | Acanthamoeba castellanii str. Neff | 4.9E-55 | 49.8 |  |
| 330 | 272764 | 273573 | + | 269 | DUF4326 domain-containing protein                           | L8GMA6        | Eukaryota | Acanthamoeba castellanii str. Neff | 2.1E-50 | 38.6 |  |
| 331 | 273624 | 275816 | + | 730 | hypothetical protein                                        | UPI000769C8AA | Bacteria  | Aliivibrio wodanis                 | 1.1E-09 | 26.3 |  |
| 332 | 275852 | 276508 | + | 218 | hypothetical protein                                        |               |           |                                    |         |      |  |
| 333 | 276505 | 277167 | + | 220 | hypothetical protein                                        |               |           |                                    |         |      |  |
| 334 | 277238 | 278137 | + | 299 | F-box domain-containing protein                             |               |           |                                    |         |      |  |

|     |        |        |   |     |                                                             |   |            |           |                                    |         |      |
|-----|--------|--------|---|-----|-------------------------------------------------------------|---|------------|-----------|------------------------------------|---------|------|
| 335 | 278248 | 278436 | + | 62  | hypothetical protein                                        |   |            |           |                                    |         |      |
| 336 | 278524 | 278784 | + | 86  | hypothetical protein                                        |   |            |           |                                    |         |      |
| 337 | 278826 | 280973 | + | 715 | FG-GAP repeat-containing protein                            |   | A0A1X6WEM0 | Viruses   | Pacmanvirus A23                    | 9.6E-15 | 30.4 |
| 338 | 281033 | 281677 | + | 214 | hypothetical protein                                        |   |            |           |                                    |         |      |
| 339 | 281736 | 282395 | + | 219 | hypothetical protein                                        |   |            |           |                                    |         |      |
| 340 | 282471 | 283505 | + | 344 | nucleoside diphosphate kinase                               |   | L8GWD2     | Eukaryota | Acanthamoeba castellanii str. Neff | 1.7E-53 | 36.6 |
| 341 | 283521 | 283922 | - | 133 | PAN domain-containing protein                               |   | L8GYA1     | Eukaryota | Acanthamoeba castellanii str. Neff | 5.0E-20 | 39.4 |
| 342 | 283980 | 284345 | - | 121 | PAN domain-containing protein                               |   | L8GYA1     | Eukaryota | Acanthamoeba castellanii str. Neff | 1.1E-21 | 42.5 |
| 343 | 284459 | 284581 | + | 40  | hypothetical protein                                        |   |            |           |                                    |         |      |
| 344 | 284604 | 285347 | - | 247 | hypothetical protein                                        |   |            |           |                                    |         |      |
| 345 | 285513 | 285779 | + | 88  | hypothetical protein                                        |   |            |           |                                    |         |      |
| 346 | 285853 | 286659 | - | 268 | proliferating cell nuclear antigen                          |   | A0A2B4RZH5 | Eukaryota | Stylophora pistillata              | 1.6E-34 | 31.6 |
| 347 | 286720 | 287256 | - | 178 | hypothetical protein                                        |   |            |           |                                    |         |      |
| 348 | 287401 | 287895 | - | 164 | deoxyuridine triphosphatase                                 |   | K7PC95     | Viruses   | Cyprinid herpesvirus 1             | 6.8E-36 | 50.0 |
| 349 | 287882 | 288421 | - | 179 | thioredoxin                                                 |   | L8GZB6     | Eukaryota | Acanthamoeba castellanii str. Neff | 2.4E-09 | 42.3 |
| 350 | 288476 | 288640 | - | 54  | hypothetical protein                                        |   |            |           |                                    |         |      |
| 351 | 288700 | 289377 | - | 225 | hypothetical protein                                        |   | L8H9G2     | Eukaryota | Acanthamoeba castellanii str. Neff | 2.6E-31 | 47.4 |
| 352 | 289485 | 289892 | + | 135 | hypothetical protein                                        |   |            |           |                                    |         |      |
| 353 | 290071 | 290625 | + | 184 | hypothetical protein                                        |   |            |           |                                    |         |      |
| 354 | 290661 | 291173 | + | 170 | hypothetical protein                                        |   | L8HBP7     | Eukaryota | Acanthamoeba castellanii str. Neff | 1.3E-21 | 37.3 |
| 355 | 291247 | 291579 | + | 110 | hypothetical protein                                        |   |            |           |                                    |         |      |
| 356 | 291700 | 292281 | - | 173 | GTP binding nuclear protein Ran                             | 1 | L8GL91     | Eukaryota | Acanthamoeba castellanii str. Neff | 4.8E-42 | 47.7 |
| 357 | 292283 | 293038 | - | 251 | hypothetical protein                                        |   | L8HAS6     | Eukaryota | Acanthamoeba castellanii str. Neff | 5.8E-14 | 36.9 |
| 358 | 293120 | 293410 | + | 96  | hypothetical protein                                        |   |            |           |                                    |         |      |
| 359 | 293473 | 294027 | + | 184 | hypothetical protein                                        |   |            |           |                                    |         |      |
| 360 | 294040 | 294438 | + | 132 | hypothetical protein                                        |   |            |           |                                    |         |      |
| 361 | 294480 | 295979 | + | 499 | Rho termination factor N-terminal domain-containing protein |   | L8GZ43     | Eukaryota | Acanthamoeba castellanii str. Neff | 1.1E-05 | 39.8 |
| 362 | 295991 | 296482 | - | 163 | hypothetical protein                                        |   |            |           |                                    |         |      |

|     |        |        |   |     |                                    |            |           |                                                   |          |      |
|-----|--------|--------|---|-----|------------------------------------|------------|-----------|---------------------------------------------------|----------|------|
| 363 | 296590 | 297252 | - | 220 | ribonuclease H                     | W2VFG2     | Bacteria  | Lachnoaerobaculum                                 | 2.0E-08  | 26.5 |
| 364 | 297321 | 297647 | + | 108 | hypothetical protein               |            |           |                                                   |          |      |
| 365 | 297671 | 299545 | + | 624 | replication factor C large subunit | L8HIF4     | Eukaryota | Acanthamoeba castellanii str. Neff                | 0.0E+00  | 44.6 |
| 366 | 299552 | 299971 | - | 139 | hypothetical protein               |            |           |                                                   |          |      |
| 367 | 300089 | 300310 | + | 73  | hypothetical protein               |            |           |                                                   |          |      |
| 368 | 300307 | 300948 | - | 213 | hypothetical protein               | M11381     | Viruses   | Chlorovirus                                       | 4.0E-14  | 25.7 |
| 369 | 301075 | 301836 | - | 253 | hypothetical protein               | L8GVN3     | Eukaryota | Acanthamoeba castellanii str. Neff                | 3.4E-10  | 24.6 |
| 370 | 301924 | 302076 | + | 50  | hypothetical protein               |            |           |                                                   |          |      |
| 371 | 302132 | 302272 | - | 46  | hypothetical protein               |            |           |                                                   |          |      |
| 372 | 302458 | 303393 | - | 311 | WD40 domain-containing protein     | L8H808     | Eukaryota | Acanthamoeba castellanii str. Neff                | 6.9E-31  | 27.6 |
| 373 | 303447 | 303662 | - | 71  | hypothetical protein               |            |           |                                                   |          |      |
| 374 | 303711 | 303830 | + | 39  | hypothetical protein               |            |           |                                                   |          |      |
| 375 | 303827 | 306421 | - | 864 | DNA helicase                       | L8HBP1     | Eukaryota | Acanthamoeba castellanii str. Neff                | 4.3E-165 | 50.2 |
| 376 | 306591 | 307082 | + | 163 | hypothetical protein               |            |           |                                                   |          |      |
| 377 | 307090 | 307275 | - | 61  | hypothetical protein               |            |           |                                                   |          |      |
| 378 | 307411 | 307899 | + | 162 | hypothetical protein               |            |           |                                                   |          |      |
| 379 | 307935 | 308447 | - | 170 | hypothetical protein               | A0A2D5VP24 | Bacteria  | Pseudomonas sp.                                   | 4.8E-19  | 36.1 |
| 380 | 308580 | 308708 | + | 42  | hypothetical protein               |            |           |                                                   |          |      |
| 381 | 308736 | 309392 | - | 218 | endonuclease V                     | F2U0C9     | Eukaryota | Salpingoeca rosetta (strain ATCC 50818 / BSB-021) | 2.2E-83  | 56.9 |
| 382 | 309385 | 309888 | - | 167 | hypothetical protein               |            |           |                                                   |          |      |
| 383 | 310142 | 310396 | + | 84  | hypothetical protein               |            |           |                                                   |          |      |
| 384 | 310416 | 310517 | - | 33  | hypothetical protein               |            |           |                                                   |          |      |
| 385 | 310838 | 311179 | + | 113 | hypothetical protein               |            |           |                                                   |          |      |
| 386 | 311264 | 311722 | + | 152 | hypothetical protein               |            |           |                                                   |          |      |
| 387 | 311685 | 312212 | - | 175 | hypothetical protein               |            |           |                                                   |          |      |
| 388 | 312276 | 312947 | - | 223 | UBA-like domain-containing protein | A0A072V2D6 | Eukaryota | Medicago truncatula                               | 4.2E-05  | 43.8 |
| 389 | 313085 | 313300 | + | 71  | hypothetical protein               |            |           |                                                   |          |      |
| 390 | 313396 | 314073 | + | 225 | hypothetical protein               |            |           |                                                   |          |      |

|     |        |        |   |      |                                    |   |               |           |                                         |          |      |
|-----|--------|--------|---|------|------------------------------------|---|---------------|-----------|-----------------------------------------|----------|------|
| 391 | 314091 | 315107 | - | 338  | hypothetical protein               |   |               |           |                                         |          |      |
| 392 | 315238 | 315666 | + | 142  | hypothetical protein               |   |               |           |                                         |          |      |
| 393 | 315783 | 316082 | + | 99   | initiation factor eIF1/SUI         |   | L8GHP9        | Eukaryota | Acanthamoeba castellanii str. Neff      | 1.1E-31  | 49.0 |
| 394 | 316076 | 317092 | - | 338  | hypothetical protein               |   |               |           |                                         |          |      |
| 395 | 317231 | 317494 | + | 87   | hypothetical protein               |   |               |           |                                         |          |      |
| 396 | 317513 | 317788 | - | 91   | hypothetical protein               |   |               |           |                                         |          |      |
| 397 | 317997 | 318239 | + | 80   | hypothetical protein               |   |               |           |                                         |          |      |
| 398 | 318272 | 319420 | + | 382  | protein phosphatase 2C             |   | A0A0A1TY5     | Eukaryota | Entamoeba invadens                      | 8.3E-18  | 28.9 |
| 399 | 319428 | 319862 | + | 144  | hypothetical protein               |   |               |           |                                         |          |      |
| 400 | 319863 | 320705 | + | 280  | hypothetical protein               |   |               |           |                                         |          |      |
| 401 | 320965 | 321513 | + | 182  | hypothetical protein               |   | A0A146JEC3    | Viruses   | Tokyoivirus A1                          | 5.2E-44  | 44.9 |
| 402 | 321614 | 321862 | + | 82   | hypothetical protein               |   |               |           |                                         |          |      |
| 403 | 321936 | 322577 | + | 213  | hypothetical protein               |   | L8GM35        | Eukaryota | Acanthamoeba castellanii str. Neff      | 7.8E-05  | 42.2 |
| 404 | 322602 | 322835 | - | 77   | hypothetical protein               |   | L8HD82        | Eukaryota | Acanthamoeba castellanii str. Neff      | 1.5E-30  | 74.6 |
| 405 | 322911 | 323435 | - | 174  | hypothetical protein               |   | L8HAT1        | Eukaryota | Acanthamoeba castellanii str. Neff      | 4.1E-10  | 26.0 |
| 406 | 323491 | 323952 | - | 153  | SET domain-containing protein      |   | I0XTT5        | Bacteria  | Leptospiraceae                          | 9.0E-15  | 34.7 |
| 407 | 324039 | 324302 | + | 87   | hypothetical protein               |   | L8H0J5        | Eukaryota | Acanthamoeba castellanii str. Neff      | 1.3E-10  | 37.3 |
| 408 | 324310 | 324567 | - | 85   | hypothetical protein               |   |               |           |                                         |          |      |
| 409 | 324573 | 327206 | - | 877  | putative DNA primase               |   | A0A0P0YMW5    | Viruses   | Yellowstone lake phycodnavirus 1        | 1.3E-49  | 29.4 |
| 410 | 327330 | 327740 | - | 136  | hypothetical protein               |   |               |           |                                         |          |      |
| 411 | 327811 | 332290 | - | 1257 | DNA polymerase                     | 3 | UPI0006251E38 | Eukaryota | Athalia rosae                           | 3.1E-131 | 29.9 |
| 412 | 332436 | 333383 | + | 315  | Ser/Thr protein kinase             |   | L8H9C4        | Eukaryota | Acanthamoeba castellanii str. Neff      | 3.8E-84  | 44.4 |
| 413 | 333436 | 335877 | + | 813  | hypothetical protein               |   | V6T8N0        | Eukaryota | Giardia intestinalis                    | 6.1E-04  | 28.1 |
| 414 | 335874 | 337169 | - | 431  | proliferating cell nuclear antigen |   | A0A2E4HLZ5    | Bacteria  | Nitrospinae bacterium                   | 3.4E-30  | 28.8 |
| 415 | 337253 | 337633 | - | 126  | hypothetical protein               |   |               |           |                                         |          |      |
| 416 | 337796 | 338026 | - | 76   | hypothetical protein               |   |               |           |                                         |          |      |
| 417 | 338202 | 338822 | + | 206  | hypothetical protein               |   | I0YQH0        | Eukaryota | Coccomyxa subellipsoidea (strain C-169) | 4.3E-06  | 30.0 |
| 418 | 338964 | 340259 | + | 431  | hypothetical protein               |   | UPI0006797E21 | Archaea   | Halapricum salinum                      | 3.0E-12  | 33.1 |



|     |        |        |   |      |                                      |               |           |                                                                           |         |      |
|-----|--------|--------|---|------|--------------------------------------|---------------|-----------|---------------------------------------------------------------------------|---------|------|
| 419 | 340555 | 341334 | - | 259  | metacaspase                          | UPI0004417EA8 | Eukaryota | <i>Punctularia strigosozonata</i> (strain HHB-11173)                      | 4.8E-38 | 38.3 |
| 420 | 341425 | 342429 | - | 334  | putative VLF-2 transcription factor  | V5LSF6        | Viruses   | unclassified Coccilithovirus                                              | 1.8E-08 | 31.2 |
| 421 | 342577 | 344577 | - | 666  | hypothetical protein                 | L8GKP6        | Eukaryota | <i>Acanthamoeba castellanii</i> str. Neff                                 | 1.3E-12 | 35.2 |
| 422 | 344759 | 345730 | + | 323  | hypothetical protein                 | A0A1Y11QV2    | Eukaryota | <i>Klebsormidium nitens</i>                                               | 2.7E-15 | 27.8 |
| 423 | 345811 | 346188 | - | 125  | hypothetical protein                 | Q8QNI3        | Viruses   | <i>Ectocarpus siliculosus</i> virus 1 (isolate New Zealand/Kaikoura/1988) | 2.2E-14 | 41.9 |
| 424 | 346304 | 347104 | + | 266  | BTB/POZ domain-containing protein    |               |           |                                                                           |         |      |
| 425 | 347194 | 347661 | + | 155  | hypothetical protein                 |               |           |                                                                           |         |      |
| 426 | 347724 | 348056 | + | 110  | hypothetical protein                 |               |           |                                                                           |         |      |
| 427 | 348098 | 348373 | + | 91   | hypothetical protein                 |               |           |                                                                           |         |      |
| 428 | 348445 | 348762 | + | 105  | hypothetical protein                 |               |           |                                                                           |         |      |
| 429 | 348771 | 351173 | - | 800  | hypothetical protein                 | L8GLA0        | Eukaryota | <i>Acanthamoeba castellanii</i> str. Neff                                 | 5.8E-31 | 38.2 |
| 430 | 351285 | 352196 | - | 303  | nudix hydrolase                      | A0A1X7TYR1    | Eukaryota | <i>Amphimedon queenslandica</i>                                           | 7.1E-25 | 30.3 |
| 431 | 352260 | 352559 | + | 99   | hypothetical protein                 |               |           |                                                                           |         |      |
| 432 | 352657 | 355797 | + | 1046 | hypothetical protein                 |               |           |                                                                           |         |      |
| 433 | 355900 | 359034 | + | 1044 | LYR motif-containing protein         |               |           |                                                                           |         |      |
| 434 | 359081 | 360241 | - | 386  | hypothetical protein                 |               |           |                                                                           |         |      |
| 435 | 360304 | 360912 | - | 202  | hypothetical protein                 |               |           |                                                                           |         |      |
| 436 | 360956 | 361615 | - | 219  | hypothetical protein                 |               |           |                                                                           |         |      |
| 437 | 361674 | 361835 | - | 53   | hypothetical protein                 | A0A1Y2HA82    | Eukaryota | <i>Catenaria anguillulae</i> PL171                                        | 5.5E-06 | 55.9 |
| 438 | 361978 | 362706 | + | 242  | hypothetical protein                 | L8GX11        | Eukaryota | <i>Acanthamoeba castellanii</i> str. Neff                                 | 1.1E-05 | 50.0 |
| 439 | 362787 | 363395 | + | 202  | transcription elongation factor S-II | L8GZ47        | Eukaryota | <i>Acanthamoeba castellanii</i> str. Neff                                 | 9.4E-24 | 34.1 |
| 440 | 363422 | 364411 | - | 329  | hypothetical protein                 |               |           |                                                                           |         |      |
| 441 | 364541 | 364966 | + | 141  | hypothetical protein                 |               |           |                                                                           |         |      |
| 442 | 364972 | 365619 | - | 215  | hypothetical protein                 |               |           |                                                                           |         |      |
| 443 | 365669 | 366340 | - | 223  | hypothetical protein                 |               |           |                                                                           |         |      |
| 444 | 366369 | 366626 | - | 85   | hypothetical protein                 |               |           |                                                                           |         |      |
| 445 | 366695 | 368863 | - | 722  | hypothetical protein                 | A0A1X6WEM0    | Viruses   | Pacmanvirus A23                                                           | 2.0E-15 | 28.4 |
| 446 | 369097 | 370167 | + | 356  | hypothetical protein                 |               |           |                                                                           |         |      |

|     |        |        |   |     |                                 |               |           |                                    |         |      |  |
|-----|--------|--------|---|-----|---------------------------------|---------------|-----------|------------------------------------|---------|------|--|
| 447 | 370189 | 370845 | - | 218 | hypothetical protein            |               |           |                                    |         |      |  |
| 448 | 370977 | 372467 | + | 496 | mitochondrial chaperone BCS1    | S4VVG3        | Viruses   | Pandoravirus salinus               | 2.4E-76 | 34.3 |  |
| 449 | 372475 | 373122 | - | 215 | hypothetical protein            |               |           |                                    |         |      |  |
| 450 | 373192 | 373638 | + | 148 | hypothetical protein            |               |           |                                    |         |      |  |
| 451 | 373701 | 374111 | + | 136 | hypothetical protein            |               |           |                                    |         |      |  |
| 452 | 374091 | 374585 | - | 164 | hypothetical protein            | L8HDD7        | Eukaryota | Acanthamoeba castellanii str. Neff | 4.5E-09 | 37.9 |  |
| 453 | 374746 | 375285 | - | 179 | F-box domain-containing protein |               |           |                                    |         |      |  |
| 454 | 375284 | 375769 | + | 161 | PAN domain-containing protein   | L8GX08        | Eukaryota | Acanthamoeba castellanii str. Neff | 7.1E-30 | 44.3 |  |
| 455 | 375782 | 376504 | - | 240 | zFYND domain-containing protein | UPI000440B3FC | Eukaryota | Stereum hirsutum (strain FP-91666) | 1.1E-06 | 50.0 |  |
| 456 | 376556 | 376954 | - | 132 | hypothetical protein            |               |           |                                    |         |      |  |
| 457 | 377021 | 377236 | - | 71  | hypothetical protein            |               |           |                                    |         |      |  |
| 458 | 377240 | 378016 | - | 258 | hypothetical protein            |               |           |                                    |         |      |  |
| 459 | 378085 | 378669 | - | 194 | dihydrofolate reductase         | UPI0007E7FC81 | Eukaryota | Drosophila biarmipes               | 5.9E-32 | 39.0 |  |
| 460 | 378687 | 379229 | + | 180 | hypothetical protein            |               |           |                                    |         |      |  |
| 461 | 379604 | 380338 | + | 244 | hypothetical protein            |               |           |                                    |         |      |  |
